# Supplementary material
Source: publisher figshare collection journal article supplement (https://acs.figshare.com/ndownloader/files/18291467)
Supplement: Supplementary file 1 [file 18291467]

# Semiautomated parallel RAFT copolymerization of isoprene with glycidyl methacrylate

*Miguel Rosales-Guzman<sup>‡ a,b</sup>, Odilia Pérez-Camacho,<sup>a</sup> Carlos Guerrero-Sánchez,<sup>b</sup> Simon Harrisson,<sup>c</sup> Román Torres-Lubián,<sup>a</sup> Jürgen Vitz,<sup>b</sup> Ulrich S. Schubert<sup>b</sup> and Enrique Saldivar-Guerra<sup>a</sup>*

<sup>a</sup>Centro de Investigación en Química Aplicada, Saltillo, Coahuila 25294, Mexico.

<sup>b</sup>Laboratory of Organic and Macromolecular Chemistry (IOMC) and Jena Center for Soft Matter (JCSM), Friedrich Schiller University Jena, Jena 07743, Germany.

<sup>c</sup>Laboratoire des IMRCP, Université de Toulouse, CNRS UMR 5623, Université Paul Sabatier, 118 route de Narbonne, 31062 Toulouse Cedex 9, France.

<sup>‡</sup>Current affiliation: Universidad Tecnológica de Saltillo, Calle Nogal s/n, Ejido la Providencia, Saltillo, Coahuila 25300, México.

## Supporting Information

### Contents

#### 1. Table S1

**Table S1. Steps of the inertization and copolymerization reactions in the automated synthesizer**

| Step                | Macro task                        | Task             | Description                                                     |
|---------------------|-----------------------------------|------------------|-----------------------------------------------------------------|
| <b>1</b>            | Inertization of the reactors      |                  |                                                                 |
| <b>Loop 3 times</b> | 1.1                               | Set drawer valve | Set reaction block state to closed under inert gas              |
|                     | 1.2                               | Heat/cool        | Thermostat on, pressure block (45 °C)                           |
|                     | 1.3                               | Wait             | Waiting for 5 minutes                                           |
|                     | 1.4                               | Set vacuum       | Vacuum on (zone reactors)                                       |
|                     | 1.5                               | Set drawer valve | Set reaction block state to closed under vacuum                 |
|                     | 1.6                               | Wait             | Waiting for 1 minute                                            |
|                     | 1.7                               | Set vacuum       | Vacuum off (zone reactors)                                      |
|                     | 1.8                               | Heat/cool        | Thermostat on, pressure block (0 °C)                            |
|                     | 1.9                               | Set drawer valve | Set reaction block state to open under inert gas                |
|                     | 1.10                              | Wait             | Waiting for 15 minutes                                          |
| <b>2</b>            | Inertization of reaction solution |                  |                                                                 |
| <b>Loop 3 times</b> | 2.1                               | Set drawer valve | Set the reaction block state to closed under pressure (1.1 MPa) |
|                     | 2.2                               | Wait             | Waiting for 20 seconds                                          |

|          |                         |                             |                                                                 |
|----------|-------------------------|-----------------------------|-----------------------------------------------------------------|
|          | 2.3                     | Set drawer valve            | Set the reaction block state to open under inert gas            |
| <b>3</b> | Polymerization reaction |                             |                                                                 |
|          | 2.4                     | Set drawer valve            | Set the reaction block state to closed under pressure (1.1 MPa) |
|          |                         | Heat/cool                   | Thermostat on, pressure block (115 °C)                          |
|          | 2.5                     | Waiting for “reaction time” |                                                                 |
|          | 2.6                     | Heat/cool                   | Thermostat on, pressure block (20 °C)                           |
|          | 2.7                     | Set drawer valve            | Set the reaction block state to open under inert gas            |
|          |                         | Heat/cool                   | Thermostat off                                                  |
